# Supplementary material for: Hierarchical structured Mn2O3 nanomaterials with excellent electrochemical properties for lithium ion batteries
Source: Royal Society of Chemistry journal article supplement (doi:10.1039/c8ra08985j), 2019-01-01
Supplement: c8ra08985j1.pdf [file c8ra08985j1.pdf]

## Supplementary Information

### Hierarchical structured $\text{Mn}_2\text{O}_3$ nanomaterials with excellent electrochemical properties for lithium ion batteries

Su Meng<sup>a,c</sup>, Wenchao Yan<sup>a,b\*</sup>, Xiaodi Ma<sup>a</sup>, Deye Sun<sup>a</sup>, Yongcheng Jin<sup>a\*</sup>,  
Kuang He<sup>d\*</sup>

---

<sup>a</sup>Center of Materials Science and Optoelectronics Engineering, University of Chinese Academy of Sciences, Beijing 100049, China. E-mail: jinye@qibebt.ac.cn

<sup>b</sup>School of Materials Science & Engineering, Linyi university, Linyi 276000, P. R. China

<sup>c</sup>University of Chinese Academy of Science, 19A Yuquanlu Road, Beijing 100049, P. R. China

<sup>d</sup>Institute of metal research, Chinese Academy of Sciences, Wenhua Road 72, Shenhe District, Shenyang 110016, China.

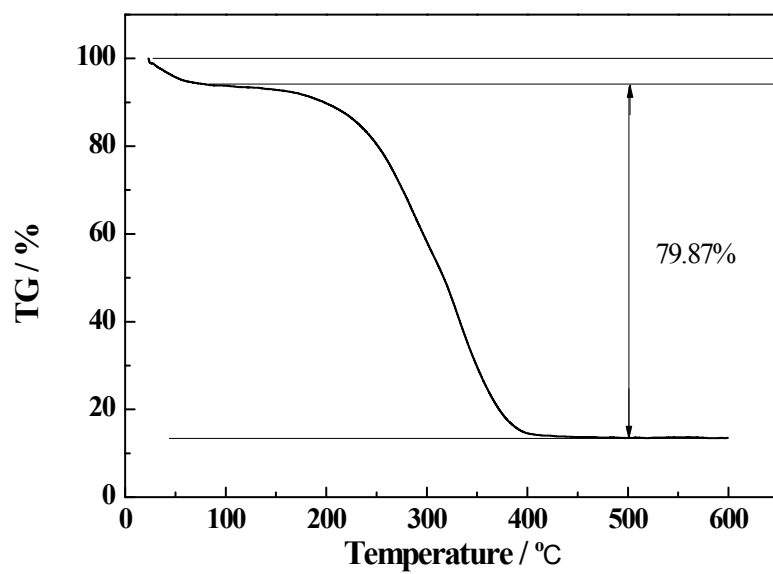

Fig.S1 TG curve of leaf-template adsorbed  $\text{Mn}(\text{CH}_3\text{COO})_2$

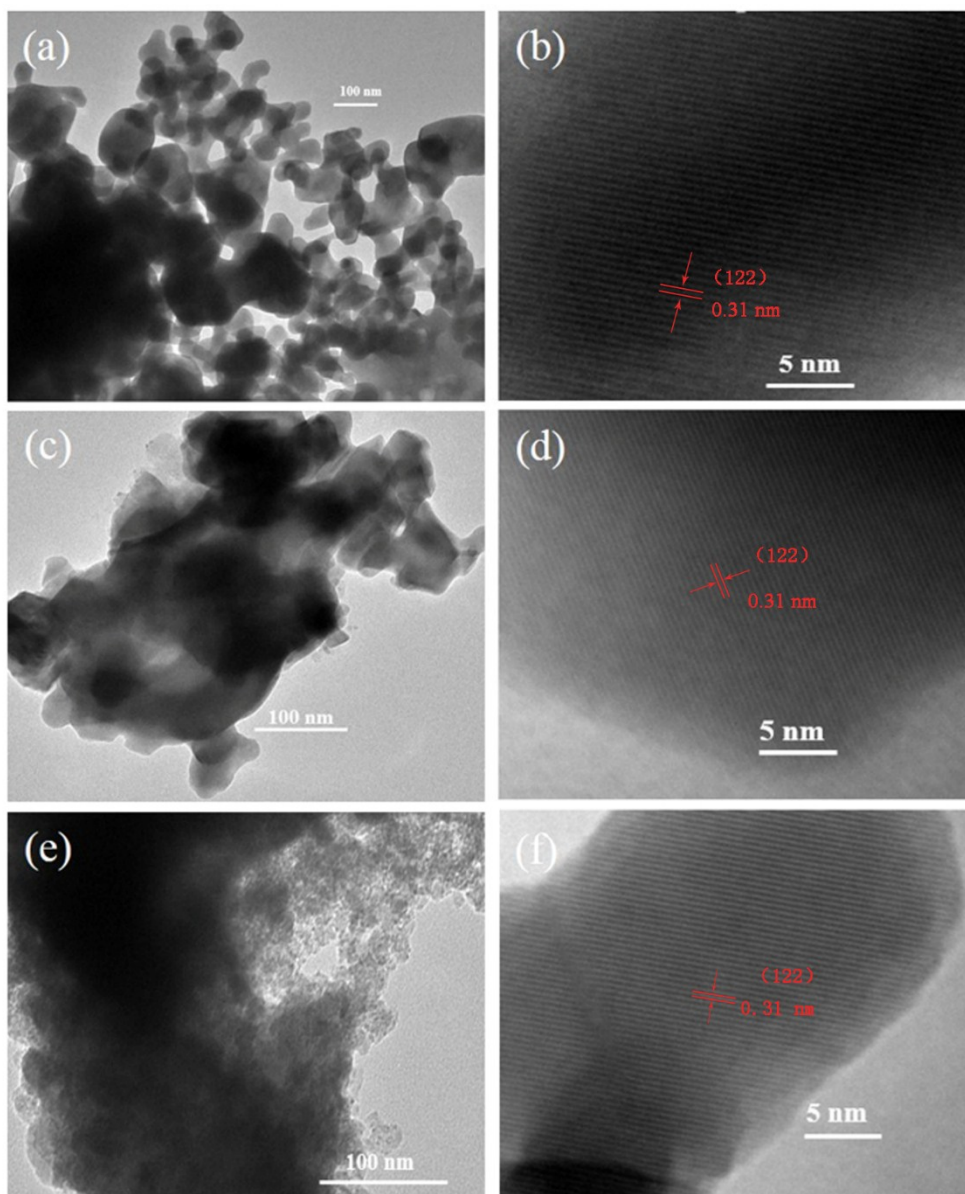

Fig. S2 TEM images of G-Mn<sub>2</sub>O<sub>3</sub> (a,b), P-Mn<sub>2</sub>O<sub>3</sub> (c,d) and T-Mn<sub>2</sub>O<sub>3</sub> (e,f).

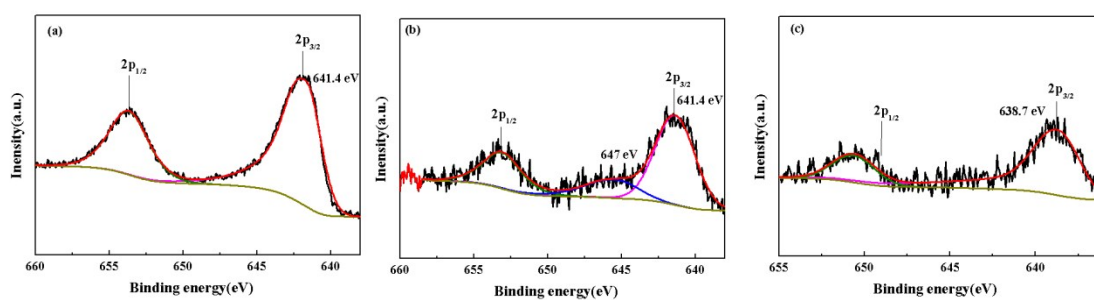

Fig.S3 XPS spectra of G-Mn<sub>2</sub>O<sub>3</sub> material at different discharge state (a) pristine material, (b) discharge state at 0.25 V and (c) discharge state at 0.01 V.

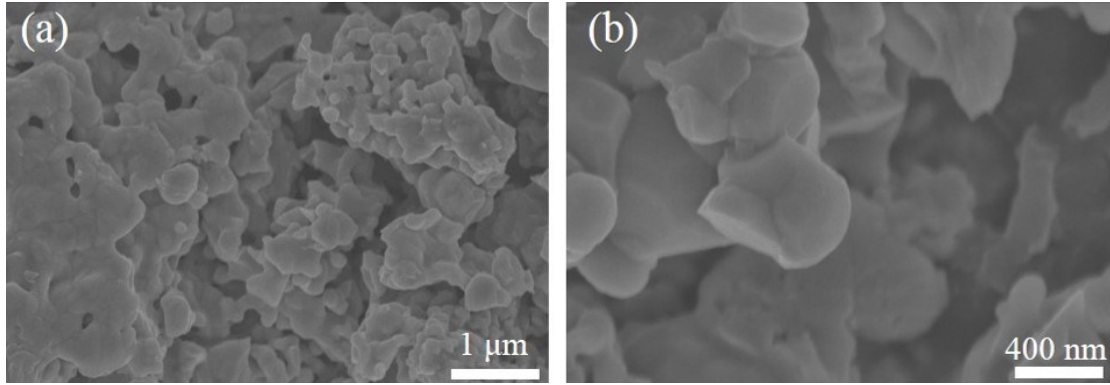

Fig.S4 SEM images of the powder-Mn<sub>2</sub>O<sub>3</sub>.

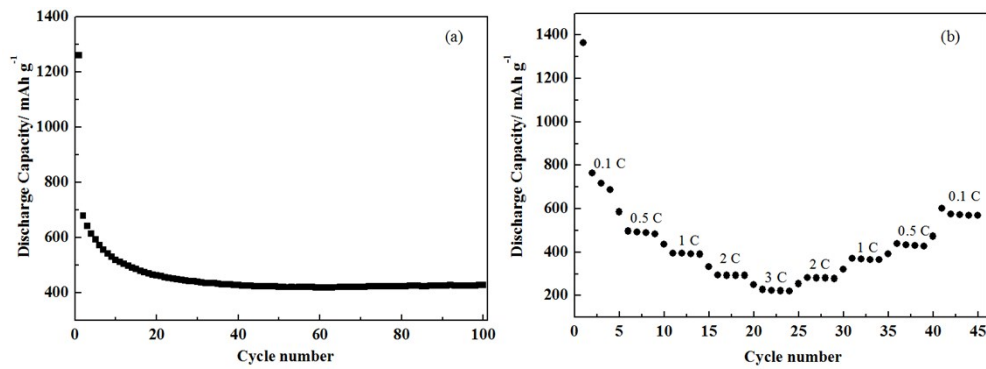

Fig.S5 (a) Cycle performance and (b) rate capability of powder -Mn<sub>2</sub>O<sub>3</sub>.

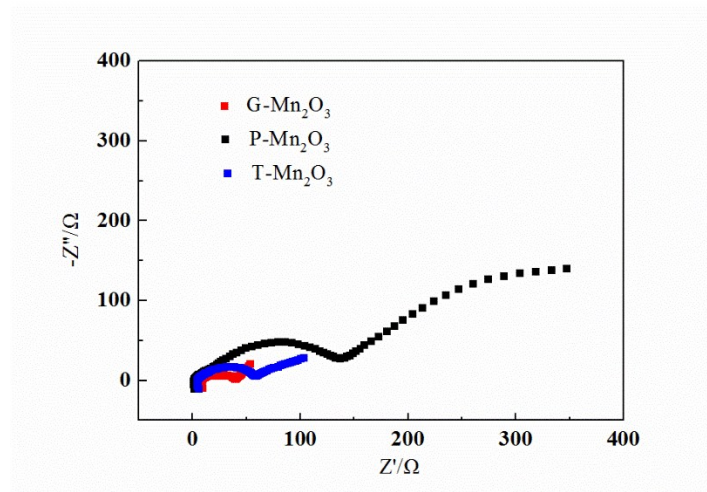

Fig.S6 Electrochemical impedance spectra test were performed after cycling at 0.3 C in 300th cycle. The OCV of all the cells was 0.01 V (Discharge period).

| Morphology                               | Capacity (mAh g <sup>-1</sup> )/cycles/<br>current density (mA g <sup>-1</sup> ) | Rate capability(mAh g <sup>-1</sup> ) |       |       | References |
|------------------------------------------|----------------------------------------------------------------------------------|---------------------------------------|-------|-------|------------|
|                                          |                                                                                  | 1000                                  | 2000  | 3000  |            |
| Hierarchically<br>microsphere            | 920/100/200                                                                      |                                       | 528.4 |       | [1]        |
| Porous nanoplates                        | 813.7/50/100                                                                     |                                       | 448.4 |       | [2]        |
| nanowires                                | 502.3/100/100                                                                    | 220                                   |       |       | [3]        |
| Hierarchically porous<br>single crystals | 845/50/100                                                                       | 410                                   |       |       | [4]        |
| porous octahedra                         | 755/100/200                                                                      | 509                                   | 411   |       | [5]        |
| Hollow core-shell<br>microspheres        | 620/500/1000                                                                     | 343                                   | 237   |       | [6]        |
| Hierarchically porous<br>structure       | 1274.6/300/300                                                                   | 503.1                                 | 419.5 | 381.5 | Our work   |

Table S1 Comparison of electrochemical performance of Mn<sub>2</sub>O<sub>3</sub> materials prepared in this study with those reported in the literatures.

| Cycle number      | R <sub>e</sub> | R <sub>ct</sub> |
|-------------------|----------------|-----------------|
| 1 <sup>st</sup>   | 7.0            | 582.6           |
| 100 <sup>th</sup> | 7.8            | 286.2           |
| 200 <sup>th</sup> | 12.5           | 58.5            |
| 300 <sup>th</sup> | 9.2            | 46.8            |

Table S2 Related resistance parameters of G-Mn<sub>2</sub>O<sub>3</sub> electrode in the 1<sup>st</sup>, 100<sup>th</sup>, 200<sup>th</sup>, and 300<sup>th</sup> cycles.

#### References

- [1] S. Shi, S. Deng, M. Zhang, M. Zhao and G. Yang, *Electrochimica Acta* **2017**, *224*, 285-294.
- [2] Y. J. Zhang, Y. Yan, X. Y. Wang, G. Li, D. R. Deng, L. Jiang, C. Y. Shu and C. R. Wang, *Chemistry-a European Journal* **2014**, *20*, 6126-6130.
- [3] Y. H. Wang, Y. H. Wang, D. S. Jia, Z. Peng, Y. Y. Xia and G. F. Zheng, *Nano Letters* **2014**, *14*, 1080-1084.
- [4] S. Z. Huang, J. Jin, Y. Cai, Y. Li, Z. Deng, J. Y. Zeng, J. Liu, C. Wang, T. Hasan

and B. L. Su, *Scientific Reports* **2015**, *5*.

[5] B. Zhang, S. Hao, D. Xiao, J. Wu and Y. Huang, *Materials & Design* **2016**, *98*, 319-323.

[6] C. Zhang, C. Guo, Y. Wei and L. Hou, *Physical Chemistry Chemical Physics* **2016**, *18*, 4739-4744.
